# Supplementary material
Source: PubMed Central journal article supplement (PMC4418490)
Supplement: NIHMS681709-supplement-Supplemental_File.pdf [file NIHMS681709-supplement-Supplemental_File.pdf]

## **Electronic Supplementary Information (ESI) for**

# **Synthesis and Characterization of the Copper(II) Complexes of New N<sub>2</sub>S<sub>2</sub>-donor Macrocyclic Ligands: Synthesis and In Vivo Evaluation of the <sup>64</sup>Cu Complexes**

**Grazia Papini,<sup>a</sup> Simone Alidori,<sup>a</sup> Jason S. Lewis,<sup>\*b,c</sup> David E. Reichert,<sup>b</sup> Maura Pellei,<sup>a</sup> Giancarlo Gioia Lobbia,<sup>a</sup> Gráinne B. Biddlecombe,<sup>b</sup> Carolyn J. Anderson<sup>b</sup> and Carlo Santini<sup>\*a</sup>**

<sup>a</sup>*Dipartimento di Scienze Chimiche, Università di Camerino, via S. Agostino 1, 62032 Camerino MC, Italy. E-mail: carlo.santini@unicam.it*

<sup>b</sup>*Division of Radiological Sciences, Washington University School of Medicine, St. Louis, MO, 63110, USA and the Alvin J. Siteman Cancer Center, Washington University School of Medicine, St. Louis, MO, 63110, USA. E-mail: lewisj2@mskcc.org*

<sup>c</sup>*Current affiliation: Department of Radiology, Memorial Sloan-Kettering Cancer Center, New York, NY.*

Biodistribution in male, Lewis rats were injected with either complex **5** or **6** (~40  $\mu$ Ci in 150  $\mu$ L)  
Rats were examined at 3 time points

| Tissue    | $[^{64}\text{Cu}(\text{NEC-SE})]$ (7), %ID/g |                     |                     |
|-----------|----------------------------------------------|---------------------|---------------------|
|           | 1 hour                                       | 4 hour              | 24 hour             |
| blood     | 0.8504 $\pm$ 0.0510                          | 0.8968 $\pm$ 0.0795 | 0.7682 $\pm$ 0.0402 |
| lung      | 0.8379 $\pm$ 0.0652                          | 0.7684 $\pm$ 0.0445 | 0.7232 $\pm$ 0.0355 |
| liver     | 3.9192 $\pm$ 0.3631                          | 3.9045 $\pm$ 0.5402 | 3.3138 $\pm$ 0.4755 |
| spleen    | 0.5595 $\pm$ 0.0251                          | 0.7305 $\pm$ 0.1742 | 1.0456 $\pm$ 0.1056 |
| kidney    | 8.6624 $\pm$ 0.5512                          | 7.8487 $\pm$ 1.0991 | 4.9062 $\pm$ 0.2107 |
| muscle    | 0.3804 $\pm$ 0.0318                          | 0.3436 $\pm$ 0.0122 | 0.3091 $\pm$ 0.0262 |
| fat       | 0.3341 $\pm$ 0.0541                          | 0.2662 $\pm$ 0.0676 | 0.1630 $\pm$ 0.0256 |
| heart     | 0.6723 $\pm$ 0.0860                          | 0.7739 $\pm$ 0.0964 | 1.0412 $\pm$ 0.0704 |
| brain     | 0.0657 $\pm$ 0.0057                          | 0.0867 $\pm$ 0.0077 | 0.1184 $\pm$ 0.0092 |
| pituitary | 1.9725 $\pm$ 0.4205                          | 2.5130 $\pm$ 0.5310 | 1.8935 $\pm$ 0.2981 |
| bone      | 1.1308 $\pm$ 0.0720                          | 1.2740 $\pm$ 0.0818 | 0.9840 $\pm$ 0.0756 |
| marrow    | 1.1998 $\pm$ 0.0866                          | 1.7506 $\pm$ 0.1976 | 1.8567 $\pm$ 0.1073 |
| adrenals  | 0.8236 $\pm$ 0.1082                          | 0.7201 $\pm$ 0.0038 | 0.8125 $\pm$ 0.0413 |
| pancreas  | 0.9588 $\pm$ 0.1101                          | 0.8789 $\pm$ 0.0557 | 0.5753 $\pm$ 0.0298 |
| stomach   | 1.7355 $\pm$ 0.3881                          | 1.0373 $\pm$ 0.3447 | 0.6244 $\pm$ 0.1113 |
| sm int    | 2.3124 $\pm$ 0.1486                          | 2.2358 $\pm$ 0.2385 | 1.8489 $\pm$ 0.2293 |
| u lg int  | 1.7819 $\pm$ 0.3146                          | 1.6331 $\pm$ 0.2672 | 1.2160 $\pm$ 0.1536 |
| l lg int  | 0.6423 $\pm$ 0.0679                          | 1.1553 $\pm$ 0.1475 | 1.2616 $\pm$ 0.1638 |

| Tissue    | $[^{64}\text{Cu}(\text{NEC-SE})]$ (7), %ID/organ |                      |                      |
|-----------|--------------------------------------------------|----------------------|----------------------|
|           | 1 hour                                           | 4 hour               | 24 hour              |
| blood     | 5.1534 $\pm$ 0.3561                              | 5.4724 $\pm$ 0.5594  | 4.7033 $\pm$ 0.2089  |
| lung      | 0.4694 $\pm$ 0.0442                              | 0.4378 $\pm$ 0.0397  | 0.4208 $\pm$ 0.0148  |
| liver     | 15.3573 $\pm$ 1.0388                             | 13.1702 $\pm$ 1.7796 | 14.9870 $\pm$ 1.2475 |
| spleen    | 0.1485 $\pm$ 0.0086                              | 0.1841 $\pm$ 0.0538  | 0.2951 $\pm$ 0.0230  |
| kidney    | 4.3418 $\pm$ 0.1435                              | 3.8251 $\pm$ 0.3763  | 2.5616 $\pm$ 0.1046  |
| muscle    | 13.4720 $\pm$ 0.6191                             | 12.2713 $\pm$ 0.4962 | 11.0724 $\pm$ 0.6845 |
| fat       | 4.0217 $\pm$ 0.7255                              | 3.2042 $\pm$ 0.8501  | 1.9697 $\pm$ 0.3209  |
| heart     | 0.2803 $\pm$ 0.0401                              | 0.2943 $\pm$ 0.0559  | 0.4430 $\pm$ 0.0386  |
| brain     | 0.1012 $\pm$ 0.0131                              | 0.1311 $\pm$ 0.0136  | 0.1820 $\pm$ 0.0133  |
| pituitary | 0.0073 $\pm$ 0.0012                              | 0.0079 $\pm$ 0.0012  | 0.0060 $\pm$ 0.0006  |
| bone      | 10.6703 $\pm$ 0.7474                             | 12.1058 $\pm$ 1.0076 | 9.3739 $\pm$ 0.5135  |
| marrow    | 0.0544 $\pm$ 0.0062                              | 0.0851 $\pm$ 0.0200  | 0.0879 $\pm$ 0.0139  |
| adrenals  | 0.0296 $\pm$ 0.0028                              | 0.0256 $\pm$ 0.0034  | 0.0318 $\pm$ 0.0031  |
| pancreas  | 0.8063 $\pm$ 0.0981                              | 0.7154 $\pm$ 0.0357  | 0.5036 $\pm$ 0.0262  |
| stomach   | 3.1488 $\pm$ 2.7473                              | 1.5791 $\pm$ 0.1204  | 1.1546 $\pm$ 0.1309  |
| sm int    | 4.4501 $\pm$ 0.2827                              | 4.2208 $\pm$ 0.4785  | 3.8251 $\pm$ 0.3618  |
| u lg int  | 3.8146 $\pm$ 0.5804                              | 3.7430 $\pm$ 0.5009  | 3.6785 $\pm$ 0.1930  |
| l lg int  | 2.7884 $\pm$ 0.2751                              | 5.0148 $\pm$ 0.2899  | 5.8678 $\pm$ 1.7170  |

| Tissue    | <sup>64</sup> Cu(NEC-SP) (8), %ID/g |                 |                 |
|-----------|-------------------------------------|-----------------|-----------------|
|           | 1 hour                              | 4 hour          | 24 hour         |
| blood     | 0.8204 ± 0.0461                     | 0.8348 ± 0.0206 | 0.7740 ± 0.0307 |
| lung      | 0.7762 ± 0.0891                     | 0.7365 ± 0.0086 | 0.7707 ± 0.0613 |
| liver     | 3.1507 ± 0.2856                     | 3.4176 ± 0.3705 | 3.1821 ± 0.1876 |
| spleen    | 0.4826 ± 0.0538                     | 0.7043 ± 0.0141 | 1.0777 ± 0.0990 |
| kidney    | 9.4382 ± 1.0190                     | 7.8182 ± 0.6632 | 5.0696 ± 0.5182 |
| muscle    | 0.3931 ± 0.0546                     | 0.3524 ± 0.0165 | 0.3187 ± 0.0305 |
| fat       | 0.3182 ± 0.0738                     | 0.2137 ± 0.0235 | 0.1530 ± 0.0189 |
| heart     | 0.6570 ± 0.0253                     | 0.7359 ± 0.0482 | 1.0130 ± 0.0775 |
| brain     | 0.0708 ± 0.0073                     | 0.0865 ± 0.0108 | 0.1206 ± 0.0074 |
| pituitary | 2.3166 ± 0.5941                     | 2.1296 ± 0.1239 | 1.5167 ± 0.2158 |
| bone      | 1.0986 ± 0.0977                     | 1.2549 ± 0.0402 | 0.9986 ± 0.0647 |
| marrow    | 1.1274 ± 0.0404                     | 1.6730 ± 0.0385 | 1.8999 ± 0.0503 |
| adrenals  | 0.7995 ± 0.2038                     | 0.7159 ± 0.0142 | 0.7352 ± 0.0868 |
| pancreas  | 0.8859 ± 0.0708                     | 0.8686 ± 0.0189 | 0.5714 ± 0.0434 |
| stomach   | 1.1381 ± 0.1548                     | 1.1291 ± 0.2482 | 0.5979 ± 0.1881 |
| sm int    | 2.1204 ± 0.2397                     | 2.2102 ± 0.1866 | 1.8591 ± 0.1783 |
| u lg int  | 1.5406 ± 0.2163                     | 1.5746 ± 0.1370 | 1.2246 ± 0.1285 |
| l lg int  | 0.6184 ± 0.0745                     | 1.1438 ± 0.0344 | 1.2009 ± 0.0909 |

| Tissue    | <b>[<sup>64</sup>Cu(NEC-SP)] (8), %ID/organ</b> |                  |                  |
|-----------|-------------------------------------------------|------------------|------------------|
|           | <b>1 hour</b>                                   | <b>4 hour</b>    | <b>24 hour</b>   |
| blood     | 5.0815 ± 0.2045                                 | 5.4621 ± 0.1852  | 4.6416 ± 0.1062  |
| lung      | 0.4004 ± 0.0591                                 | 0.4249 ± 0.0229  | 0.4466 ± 0.0469  |
| liver     | 12.1934 ± 0.9247                                | 13.3691 ± 0.5757 | 14.5346 ± 0.3398 |
| spleen    | 0.1201 ± 0.0256                                 | 0.1950 ± 0.0180  | 0.2886 ± 0.0271  |
| kidney    | 4.9000 ± 0.6496                                 | 4.1334 ± 0.2921  | 2.5881 ± 0.1932  |
| muscle    | 14.2360 ± 1.6459                                | 13.4920 ± 0.1519 | 11.1814 ± 0.7838 |
| fat       | 3.8721 ± 0.8096                                 | 2.7506 ± 0.2269  | 1.8088 ± 0.2138  |
| heart     | 0.2838 ± 0.0140                                 | 0.3171 ± 0.0354  | 0.4086 ± 0.0334  |
| brain     | 0.1115 ± 0.0101                                 | 0.1331 ± 0.0171  | 0.1844 ± 0.0140  |
| pituitary | 0.0083 ± 0.0014                                 | 0.0075 ± 0.0010  | 0.0053 ± 0.0007  |
| bone      | 10.5819 ± 0.6005                                | 12.7803 ± 0.2140 | 9.3194 ± 0.3564  |
| marrow    | 0.0458 ± 0.0083                                 | 0.0758 ± 0.0101  | 0.0813 ± 0.0160  |
| adrenals  | 0.0272 ± 0.0101                                 | 0.0294 ± 0.0043  | 0.0266 ± 0.0048  |
| pancreas  | 0.7401 ± 0.0402                                 | 0.7799 ± 0.0648  | 0.4986 ± 0.0382  |
| stomach   | 1.7949 ± 0.0561                                 | 1.7978 ± 0.0947  | 1.3370 ± 0.2653  |
| sm int    | 4.4502 ± 0.2188                                 | 4.5194 ± 0.4399  | 3.8927 ± 0.4469  |
| u lg int  | 3.7927 ± 0.3612                                 | 4.0661 ± 0.2241  | 3.5477 ± 0.1964  |
| l lg int  | 2.9545 ± 0.1889                                 | 5.4550 ± 0.1347  | 6.5743 ± 0.3327  |

**[<sup>64</sup>Cu(NEC-SB)] (9), %ID/g**

|                  | 1 hr.  |     |        | 4 hr.  |     |        | 24 hr. |     |        |
|------------------|--------|-----|--------|--------|-----|--------|--------|-----|--------|
| <i>blood</i>     | 0.8738 | +/- | 0.1398 | 0.8793 | +/- | 0.1117 | 0.6925 | +/- | 0.1509 |
| <i>lung</i>      | 1.6730 | +/- | 0.2253 | 0.9489 | +/- | 0.1087 | 0.7464 | +/- | 0.1430 |
| <i>liver</i>     | 4.1054 | +/- | 0.4646 | 3.8664 | +/- | 0.6354 | 3.2960 | +/- | 0.7279 |
| <i>spleen</i>    | 0.6976 | +/- | 0.1679 | 0.8151 | +/- | 0.1366 | 0.9235 | +/- | 0.2070 |
| <i>kidney</i>    | 8.8945 | +/- | 0.6124 | 7.0956 | +/- | 1.0588 | 4.7376 | +/- | 0.6171 |
| <i>muscle</i>    | 0.4111 | +/- | 0.0557 | 0.3299 | +/- | 0.0500 | 0.3016 | +/- | 0.0330 |
| <i>fat</i>       | 0.3709 | +/- | 0.0731 | 0.2183 | +/- | 0.0371 | 0.1360 | +/- | 0.0350 |
| <i>heart</i>     | 0.8394 | +/- | 0.2282 | 0.7522 | +/- | 0.0594 | 0.9232 | +/- | 0.1891 |
| <i>brain</i>     | 0.0792 | +/- | 0.0113 | 0.0903 | +/- | 0.0068 | 0.1086 | +/- | 0.0195 |
| <i>pituitary</i> | 3.1498 | +/- | 0.8057 | 2.1487 | +/- | 0.9642 | 1.9032 | +/- | 1.6195 |
| <i>bone</i>      | 1.1426 | +/- | 0.1954 | 1.1546 | +/- | 0.1606 | 0.8548 | +/- | 0.1879 |
| <i>marrow</i>    | 1.1164 | +/- | 0.1591 | 1.5088 | +/- | 0.2664 | 1.7238 | +/- | 0.3234 |
| <i>adrenals</i>  | 0.8655 | +/- | 0.1851 | 0.7541 | +/- | 0.1404 | 0.9363 | +/- | 0.1988 |
| <i>pancreas</i>  | 0.8952 | +/- | 0.1283 | 0.8456 | +/- | 0.1745 | 0.5935 | +/- | 0.1429 |
| <i>stomach</i>   | 1.5054 | +/- | 0.5496 | 1.2625 | +/- | 0.4010 | 0.6760 | +/- | 0.2047 |
| <i>sm int</i>    | 2.3465 | +/- | 0.3124 | 2.1002 | +/- | 0.2551 | 1.7107 | +/- | 0.1795 |
| <i>u lg int</i>  | 1.7314 | +/- | 0.1940 | 1.5708 | +/- | 0.2721 | 1.1087 | +/- | 0.1641 |
| <i>l lg int</i>  | 0.6986 | +/- | 0.1439 | 1.1160 | +/- | 0.2475 | 1.2342 | +/- | 0.1904 |
| <i>tail</i>      | 2.2282 | +/- | 1.6246 | 3.0701 | +/- | 2.0105 | 1.4050 | +/- | 0.2416 |

|                  | $[^{64}\text{Cu}(\text{NEC-SB})]$ (9), %ID/organ |     |        | 1 hr.   |     |        | 4 hr.   |     |        | 24 hr. |  |  |
|------------------|--------------------------------------------------|-----|--------|---------|-----|--------|---------|-----|--------|--------|--|--|
|                  |                                                  |     |        |         |     |        |         |     |        |        |  |  |
| <i>blood</i>     | 4.6204                                           | +/- | 0.3514 | 5.1034  | +/- | 0.6410 | 3.8784  | +/- | 0.6381 |        |  |  |
| <i>lung</i>      | 0.9193                                           | +/- | 0.1413 | 0.5729  | +/- | 0.0535 | 0.4637  | +/- | 0.0867 |        |  |  |
| <i>liver</i>     | 12.6959                                          | +/- | 0.9281 | 12.3851 | +/- | 1.0954 | 13.5960 | +/- | 2.2414 |        |  |  |
| <i>spleen</i>    | 0.1430                                           | +/- | 0.0183 | 0.1878  | +/- | 0.0439 | 0.2208  | +/- | 0.0410 |        |  |  |
| <i>kidney</i>    | 3.9939                                           | +/- | 0.3514 | 3.5244  | +/- | 0.6605 | 2.3495  | +/- | 0.1922 |        |  |  |
| <i>muscle</i>    | 12.7603                                          | +/- | 0.5338 | 11.1404 | +/- | 0.5636 | 9.9542  | +/- | 0.7406 |        |  |  |
| <i>fat</i>       | 3.8850                                           | +/- | 0.6169 | 2.4763  | +/- | 0.1207 | 1.5077  | +/- | 0.3369 |        |  |  |
| <i>heart</i>     | 0.2992                                           | +/- | 0.0895 | 0.2778  | +/- | 0.0335 | 0.3422  | +/- | 0.0457 |        |  |  |
| <i>brain</i>     | 0.1185                                           | +/- | 0.0147 | 0.1361  | +/- | 0.0069 | 0.1694  | +/- | 0.0309 |        |  |  |
| <i>pituitary</i> | 0.0069                                           | +/- | 0.0010 | 0.0058  | +/- | 0.0011 | 0.0070  | +/- | 0.0057 |        |  |  |
| <i>bone</i>      | 9.3966                                           | +/- | 0.7776 | 10.3772 | +/- | 0.4961 | 7.4533  | +/- | 1.2477 |        |  |  |
| <i>marrow</i>    | 0.0483                                           | +/- | 0.0072 | 0.0696  | +/- | 0.0183 | 0.0732  | +/- | 0.0114 |        |  |  |
| <i>adrenals</i>  | 0.0250                                           | +/- | 0.0047 | 0.0249  | +/- | 0.0022 | 0.0330  | +/- | 0.0062 |        |  |  |
| <i>pancreas</i>  | 0.6493                                           | +/- | 0.0427 | 0.6852  | +/- | 0.1136 | 0.4539  | +/- | 0.0819 |        |  |  |
| <i>stomach</i>   | 1.6760                                           | +/- | 0.2189 | 1.5921  | +/- | 0.1399 | 1.0439  | +/- | 0.2958 |        |  |  |
| <i>sm int</i>    | 3.7978                                           | +/- | 0.2140 | 3.6529  | +/- | 0.2885 | 3.3009  | +/- | 0.3217 |        |  |  |
| <i>u lg int</i>  | 3.3693                                           | +/- | 0.1347 | 3.8394  | +/- | 0.5064 | 3.0604  | +/- | 0.4085 |        |  |  |
| <i>l lg int</i>  | 2.7473                                           | +/- | 0.2807 | 5.0136  | +/- | 1.7315 | 6.3314  | +/- | 0.6913 |        |  |  |
| <i>tail</i>      | 4.8471                                           | +/- | 4.3162 | 6.6370  | +/- | 4.3945 | 3.0631  | +/- | 0.4170 |        |  |  |
